# Supplementary material for: Glacial Melt in the Canadian Rockies and Potential Effects on Groundwater in the Plains Region
Source: MDPI journal article supplement (doi:10.3390/w14050733), 2022-02-25
Supplement: s1 [file s1]

## SUPPLEMENTARY MATERIAL

This supplementary material includes the detailed formulation differential equations for steady-state and transient fluid flow, as well as mass transport in porous media as used in FEFLOW (Diersch, 2014) and applied in this study.

### Model formulation

The groundwater flow equations for 2D homogeneous anisotropic fully saturated confined aquifers are described as:

$$S_s \frac{\partial h}{\partial t} = K \left( \frac{\partial^2 h}{\partial x^2} + \frac{\partial^2 h}{\partial z^2} \right) \quad (1)$$

Where  $S_s$  is specific storage coefficient ( $m^{-1}$ ),  $h$  is hydraulic head (m),  $K$  is hydraulic conductivity (m/s),  $t$  is time (s), and the coordinate axes ( $x, z$ ) coincide with the hydraulic conductivity axes.

The mass conservation equation can be written as:

$$\frac{\partial \phi(C)}{\partial t} + \nabla \cdot (\mathbf{q}C) - \nabla \cdot (\phi \mathbf{D} \nabla C) = \phi f \quad (2)$$

Where  $C$  is the salinity concentration,  $N$  is porosity,  $\mathbf{q}$  is the Darcy velocity vector,  $\mathbf{D}$  is the hydrodynamic dispersion tensor [ $L^2 T^{-1}$ ], and  $f$  is a source term.  $D$  is assumed to be independent of concentration  $C$  and its gradient. It is however considered to be a function of the flow velocity  $\mathbf{q}$  and is commonly described by the dispersion relationship for a porous medium:

$$D_{ij} = \phi D_d \delta_{ij} + \alpha_T v_q \delta_{ij} (\alpha_L - \alpha_T) \frac{v_i v_j}{v} \quad (3)$$

Where  $D_d$  is the molecular diffusion coefficient [ $L^2 T^{-1}$ ],  $\alpha_L$  and  $\alpha_T$  are the longitudinal and transverse dispersivity, respectively [ $L$ ], and  $v$  is the average Darcy velocity [ $L T^{-1}$ ].

To account for variable-density effects in the flow system, equations 1 and 2 are coupled with the density-dependent Darcy vector  $\mathbf{q}$ , as:

$$\mathbf{q} = - \frac{k}{\mu} (\nabla P^R - (\rho - \rho_o) \mathbf{g}) \quad (4)$$

Where  $k$  is permeability [ $L^2$ ],  $\mu$  is dynamic viscosity [ $M L^{-1} T^{-1}$ ],  $P^R$  is relative pressure [Pa],  $\rho$  is the fluid density [ $M L^{-3}$ ],  $\rho_o$  is the initial fluid density [ $M L^{-3}$ ], and  $g$  is the gravitational acceleration [ $L T^{-2}$ ].

The average Darcy velocity is:

$$V = q/N \quad (5)$$

The relationship between hydraulic conductivity,  $K$  (m/s), and permeability  $k$  ( $m^2$ ) is:

$$K = \frac{k\rho_o g}{\mu} \quad (6)$$
